# Supplementary material for: Site-selective doping effect, phase separation, and structure evolution in 1:1:1 triple-cation B-site ordered perovskites Ca4−xSrxGaNbO8
Source: Royal Society of Chemistry journal article supplement (doi:10.1039/c9ra09970k), 2020-01-01
Supplement: c9ra09970k1.pdf [file c9ra09970k1.pdf]

Supporting Information for

**Site-selective Doping effect, Phase Separation, and Structure  
Evolution in 1:1:1 Triple-Cation B-site Ordered Perovskites  $\text{Ca}_{4-x}\text{Sr}_x\text{GaNbO}_8$**

He Huang,<sup>a</sup> Pengfei Jiang,<sup>\*a,b</sup> Wenliang Gao,<sup>a</sup> Rihong Cong,<sup>a</sup> Tao Yang<sup>\*a</sup>

<sup>a</sup> College of Chemistry and Chemical Engineering, Chongqing University, Chongqing,  
401331, P. R. China

<sup>b</sup> College of Physics, Chongqing University, Chongqing, 401331, P. R. China

\* Corresponding authors: pengfeijiang@cqu.edu.cn, taoyang@cqu.edu.cn.

Table S1. Atomic coordinates, isotropic thermal displacement and site occupancy factors for  $\text{Ca}_{4-x}\text{Sr}_x\text{GaNbO}_8$  ( $x = 0-4$ ) obtained from Rietveld refinements against XRD data.

| $x = 0$     | $x$       | $y$        | $z$       | Occ.              | $U_{\text{iso.}} (\text{\AA}^2)$ |
|-------------|-----------|------------|-----------|-------------------|----------------------------------|
| Ca1(A1)     | 0.0703(3) | 0.2438(7)  | 0.0986(2) | 1                 | 0.0255(4)                        |
| Ca2(A2)     | 0.6056(3) | 0.7767(7)  | 0.4308(2) | 1                 | 0.0255(4)                        |
| Ca3(A3)     | 0.7547(3) | 0.2705(7)  | 0.1224(2) | 1                 | 0.0255(4)                        |
| Ca4 (B1)    | 0.7098(3) | 0.2295(7)  | 0.8593(2) | 1                 | 0.0255(4)                        |
| Nb          | 0.9244(1) | 0.7502(2)  | 0.6319(1) | 1                 | 0.0161(4)                        |
| Ga          | 0.6103(2) | 0.7083(3)  | 0.6721(1) | 1                 | 0.0183(6)                        |
| O1          | 0.5660(7) | 0.1794(17) | 0.4321(6) | 1                 | 0.0242(9)                        |
| O2          | 0.0897(8) | 0.8165(14) | 0.1398(6) | 1                 | 0.0242(9)                        |
| O3          | 0.7314(7) | 0.8107(15) | 0.6228(6) | 1                 | 0.0242(9)                        |
| O4          | 0.3246(7) | 0.1692(14) | 0.1942(6) | 1                 | 0.0242(9)                        |
| O5          | 0.3853(8) | 0.6178(13) | 0.3199(7) | 1                 | 0.0242(9)                        |
| O6          | 0.0113(9) | 0.0782(15) | 0.7217(7) | 1                 | 0.0242(9)                        |
| O7          | 0.1708(9) | 0.978(15)  | 0.9638(7) | 1                 | 0.0242(9)                        |
| O8          | 0.0850(9) | 0.9742(15) | 0.5061(7) | 1                 | 0.0242(9)                        |
| $x = 0.25$  | $x$       | $y$        | $z$       | Occ.              | $U_{\text{iso.}} (\text{\AA}^2)$ |
| Ca1/Sr1(A1) | 0.7087(3) | 0.2303(8)  | 0.8595(3) | 0.838(6)/0.162(6) | 0.028(7)                         |
| Ca2/Sr2(A2) | 0.7555(3) | 0.2494(9)  | 0.1239(3) | 0.922(5)/0.078(5) | 0.028(4)                         |
| Ca3/Sr3(A3) | 0.6034(3) | 0.7777(9)  | 0.4314(2) | 0.983(5)/0.017(5) | 0.035(3)                         |

|             |            |            |            |                   |                                |
|-------------|------------|------------|------------|-------------------|--------------------------------|
| Ca4/Sr4(B1) | 0.0735(2)  | 0.2464(7)  | 0.1024(2)  | 0.972(7)/0.028(7) | 0.017(5)                       |
| Nb          | 0.9232(2)  | 0.7511(4)  | 0.6310(1)  | 1                 | 0.020(1)                       |
| Ga          | 0.6106(2)  | 0.7094(4)  | 0.6728(2)  | 1                 | 0.019(1)                       |
| O1          | 0.5665(8)  | 0.1818(20) | 0.4304(7)  | 1                 | 0.029(2)                       |
| O2          | 0.0883(9)  | 0.8188(17) | 0.1334(7)  | 1                 | 0.029(2)                       |
| O3          | 0.7340(8)  | 0.8064(20) | 0.6312(6)  | 1                 | 0.029(2)                       |
| O4          | 0.3218(8)  | 0.1665(17) | 0.1892(7)  | 1                 | 0.029(2)                       |
| O5          | 0.3850(10) | 0.6185(15) | 0.3238(8)  | 1                 | 0.029(2)                       |
| O6          | 0.0075(10) | 0.0663(19) | 0.7247(8)  | 1                 | 0.029(2)                       |
| O7          | 0.1660(10) | 0.9816(18) | 0.9644(8)  | 1                 | 0.029(2)                       |
| O8          | 0.8528(10) | 0.9746(18) | 0.5074(8)  | 1                 | 0.029(2)                       |
| <hr/>       |            |            |            |                   |                                |
| $x = 1.0$   | $x$        | $y$        | $z$        | Occ.              | $U_{\text{iso.}} (\text{Å}^2)$ |
| <hr/>       |            |            |            |                   |                                |
| Ca1/Sr1(A1) | 0.1409(1)  | 0.2628(4)  | 0.20983(6) | 0.245(5)/0.754(5) | 0.0174(7)                      |
| Ca2/Sr2(A2) | 0.7261(3)  | 0.2833(6)  | 0.0473(1)  | 0.850(4)/0.150(4) | 0.039(1)                       |
| Ca3/Sr3(A3) | 0.4995(3)  | 0.7500(5)  | 0.12929(9) | 0.862(4)/0.138(4) | 0.0229(1)                      |
| Ca4/Sr4(B1) | 0.9763(3)  | 0.7382(6)  | 0.1037(1)  | 0.959(4)/0.041(4) | 0.026(1)                       |
| Nb          | 0.6626(2)  | 0.2496(3)  | 0.2096(1)  | 1                 | 0.0178(6)                      |
| Ga          | 0.2587(2)  | 0.2096(4)  | 0.0536(1)  | 1                 | 0.0182(7)                      |
| O1          | 0.4754(13) | 0.4571(16) | 0.2587(4)  | 1                 | 0.0178(6)                      |
| O2          | 0.7932(11) | 0.5142(14) | 0.1799(4)  | 1                 | 0.0178(6)                      |
| O3          | 0.8352(9)  | 0.2306(19) | 0.2921(3)  | 1                 | 0.0178(6)                      |
| O4          | 0.7943(11) | 0.0423(14) | 0.1548(4)  | 1                 | 0.0178(6)                      |

|             |            |            |           |                   |                                |
|-------------|------------|------------|-----------|-------------------|--------------------------------|
| O5          | 0.4608(9)  | 0.2994(15) | 0.1214(4) | 1                 | 0.0178(6)                      |
| O6          | 0.0533(10) | 0.3521(13) | 0.0823(3) | 1                 | 0.0178(6)                      |
| O7          | 0.3235(9)  | 0.3112(14) | 0.9681(4) | 1                 | 0.0178(6)                      |
| O8          | 0.2424(11) | 0.8909(12) | 0.0534(4) | 1                 | 0.0178(6)                      |
| <hr/>       |            |            |           |                   |                                |
| $x = 1.5$   | $x$        | $y$        | $z$       | Occ.              | $U_{\text{iso.}} (\text{Å}^2)$ |
| <hr/>       |            |            |           |                   |                                |
| Ca1/Sr1(A1) | 0.1424(2)  | 0.2618(5)  | 0.2101(1) | 0.074(6)/0.926(6) | 0.0213(9)                      |
| Ca2/Sr2(A2) | 0.7255(3)  | 0.2805(7)  | 0.0475(1) | 0.783(6)/0.217(6) | 0.024(1)                       |
| Ca3/Sr3(A3) | 0.7455(7)  | 0.7455(7)  | 0.1308(1) | 0.623(5)/0.377(5) | 0.021(1)                       |
| Ca4/Sr4(B1) | 0.9761(4)  | 0.7380(9)  | 0.1039(1) | 0.965(5)/0.035(5) | 0.021(1)                       |
| Nb          | 0.6623(2)  | 0.2489(5)  | 0.2097(1) | 1                 | 0.0154(7)                      |
| Ga          | 0.2579(3)  | 0.2084(5)  | 0.0531(1) | 1                 | 0.0189(9)                      |
| O1          | 0.4779(16) | 0.4619(21) | 0.2579(6) | 1                 | 0.026(1)                       |
| O2          | 0.7947(14) | 0.5147(19) | 0.1781(6) | 1                 | 0.026(1)                       |
| O3          | 0.8313(11) | 0.2533(26) | 0.2923(4) | 1                 | 0.026(1)                       |
| O4          | 0.7917(14) | 0.0392(19) | 0.1584(5) | 1                 | 0.026(1)                       |
| O5          | 0.4607(12) | 0.2933(21) | 0.1221(4) | 1                 | 0.026(1)                       |
| O6          | 0.0516(12) | 0.3593(16) | 0.0838(5) | 1                 | 0.026(1)                       |
| O7          | 0.3230(12) | 0.3145(17) | 0.9689(5) | 1                 | 0.026(1)                       |
| O8          | 0.2306(13) | 0.8921(16) | 0.0547(5) | 1                 | 0.026(1)                       |
| <hr/>       |            |            |           |                   |                                |
| $x = 2.0$   | $x$        | $y$        | $z$       | Occ.              | $U_{\text{iso.}} (\text{Å}^2)$ |
| <hr/>       |            |            |           |                   |                                |
| Ca1/Sr1(A1) | 0.1428(2)  | 0.2621(6)  | 0.2101(1) | 0.082(7)/0.918(7) | 0.0216(9)                      |
| Ca2/Sr2(A2) | 0.7278(3)  | 0.2797(7)  | 0.0471(1) | 0.522(6)/0.478(6) | 0.037(1)                       |

|             |            |            |           |                   |           |
|-------------|------------|------------|-----------|-------------------|-----------|
| Ca3/Sr3(A3) | 0.4901(3)  | 0.7470(7)  | 0.1311(1) | 0.371(6)/0.629(6) | 0.024(1)  |
| Ca4/Sr4(B1) | 0.9739(4)  | 0.7391(11) | 0.1042(2) | 0.930(6)/0.070(6) | 0.033(1)  |
| Nb          | 0.6626(2)  | 0.2099(5)  | 0.2096(1) | 1                 | 0.0212(9) |
| Ga          | 0.2571(3)  | 0.2494(6)  | 0.0533(1) | 1                 | 0.022(1)  |
| O1          | 0.4735(19) | 0.4664(25) | 0.2546(7) | 1                 | 0.032(1)  |
| O2          | 0.7922(16) | 0.5154(20) | 0.1778(6) | 1                 | 0.032(1)  |
| O3          | 0.8299(12) | 0.2510(28) | 0.2914(5) | 1                 | 0.032(1)  |
| O4          | 0.7953(16) | 0.0368(21) | 0.1597(6) | 1                 | 0.032(1)  |
| O5          | 0.4576(13) | 0.2810(25) | 0.1202(4) | 1                 | 0.032(1)  |
| O6          | 0.0595(15) | 0.3631(18) | 0.0839(5) | 1                 | 0.032(1)  |
| O7          | 0.3255(13) | 0.3096(20) | 0.9710(5) | 1                 | 0.032(1)  |
| O8          | 0.2257(15) | 0.9000(16) | 0.0537(5) | 1                 | 0.032(1)  |

---

| $x = 2.5$   | $x$        | $y$        | $z$       | Occ.              | $U_{\text{iso.}} (\text{\AA}^2)$ |
|-------------|------------|------------|-----------|-------------------|----------------------------------|
| Ca1/Sr1(A1) | 0.1435(2)  | 0.26725    | 0.2102(1) | 0.004(9)/0.996(9) | 0.0147(9)                        |
| Ca2/Sr2(A2) | 0.7271(3)  | 0.2807(6)  | 0.0469(1) | 0.332(7)/0.668(7) | 0.017(1)                         |
| Ca3/Sr3(A3) | 0.4868(3)  | 0.7521(5)  | 0.1329(1) | 0.143(8)/0.857(8) | 0.0155(9)                        |
| Ca4/Sr4(B1) | 0.9725(5)  | 0.7466(10) | 0.1049(2) | 0.926(6)/0.074(6) | 0.013(1)                         |
| Nb          | 0.6633(2)  | 0.2550(5)  | 0.2098(1) | 1                 | 0.0107(8)                        |
| Ga          | 0.2571(3)  | 0.2162(6)  | 0.0536(1) | 1                 | 0.014(1)                         |
| O1          | 0.4750(21) | 0.4732(27) | 0.2492(7) | 1                 | 0.016(1)                         |
| O2          | 0.7905(17) | 0.5224(20) | 0.1780(6) | 1                 | 0.016(1)                         |
| O3          | 0.8284(12) | 0.2332(27) | 0.2939(5) | 1                 | 0.016(1)                         |

|             |            |            |           |                    |                                  |
|-------------|------------|------------|-----------|--------------------|----------------------------------|
| O4          | 0.8033(18) | 0.0424(21) | 0.1635(6) | 1                  | 0.016(1)                         |
| O5          | 0.4600(13) | 0.2653(27) | 0.1224(4) | 1                  | 0.016(1)                         |
| O6          | 0.0633(16) | 0.3667(19) | 0.0863(5) | 1                  | 0.016(1)                         |
| O7          | 0.3217(14) | 0.3025(21) | 0.9694(5) | 1                  | 0.016(1)                         |
| O8          | 0.2143(16) | 0.8996(17) | 0.0555(5) | 1                  | 0.016(1)                         |
| <hr/>       |            |            |           |                    |                                  |
| $x = 3.0$   | $x$        | $y$        | $z$       | Occ.               | $U_{\text{iso.}} (\text{\AA}^2)$ |
| <hr/>       |            |            |           |                    |                                  |
| Ca1/Sr1(A1) | 0.1434(3)  | 0.2693(6)  | 0.2099(1) | 1                  | 0.019(1)                         |
| Ca2/Sr2(A2) | 0.7226(3)  | 0.2795(6)  | 0.0466(1) | 0.088(7)/0.912(7)  | 0.020(1)                         |
| Ca3/Sr3(A3) | 0.4846(3)  | 0.7539(6)  | 0.1335(1) | 0.019(11)/0.981(8) | 0.017(1)                         |
| Ca4/Sr4(B1) | 0.9714(5)  | 0.7535(10) | 0.1045(2) | 0.809(8)/0.191(8)  | 0.019(1)                         |
| Nb          | 0.6636(3)  | 0.2186(7)  | 0.0542(1) | 1                  | 0.016(1)                         |
| Ga          | 0.2583(4)  | 0.2577(5)  | 0.2100(1) | 1                  | 0.017(1)                         |
| O1          | 0.4806(28) | 0.4841(34) | 0.2495(9) | 1                  | 0.020(1)                         |
| O2          | 0.7916(21) | 0.5284(23) | 0.1785(7) | 1                  | 0.020(1)                         |
| O3          | 0.8298(15) | 0.2321(30) | 0.2935(6) | 1                  | 0.020(1)                         |
| O4          | 0.7987(22) | 0.0413(26) | 0.1651(7) | 1                  | 0.020(1)                         |
| O5          | 0.4548(16) | 0.2735(30) | 0.1245(5) | 1                  | 0.020(1)                         |
| O6          | 0.0616(18) | 0.3625(21) | 0.0844(6) | 1                  | 0.020(1)                         |
| O7          | 0.3230(17) | 0.2946(26) | 0.9709(6) | 1                  | 0.020(1)                         |
| O8          | 0.2143(19) | 0.9015(20) | 0.0570(6) | 1                  | 0.020(1)                         |
| <hr/>       |            |            |           |                    |                                  |
| $x = 3.5$   | $x$        | $y$        | $z$       | Occ.               | $U_{\text{iso.}} (\text{\AA}^2)$ |
| <hr/>       |            |            |           |                    |                                  |
| Ca1/Sr1(A1) | 0.1433(2)  | 0.2719(5)  | 0.2103(1) | 1                  | 0.0191(9)                        |

|             |            |            |           |                   |           |
|-------------|------------|------------|-----------|-------------------|-----------|
| Ca2/Sr2(A2) | 0.7151(2)  | 0.2788(5)  | 0.0473(1) | 0.027(6)/0.973(6) | 0.021(1)  |
| Ca3/Sr3(A3) | 0.4896(2)  | 0.7529(5)  | 0.1353(1) | 0.003(6)/0.997(6) | 0.016(1)  |
| Ca4/Sr4(B1) | 0.9720(3)  | 0.7518(6)  | 0.1013(1) | 0.421(6)/0.579(6) | 0.021(1)  |
| Nb          | 0.6626(2)  | 0.2582(4)  | 0.2103(1) | 1                 | 0.0161(9) |
| Ga          | 0.2585(3)  | 0.2143(5)  | 0.0553(1) | 1                 | 0.012(1)  |
| O1          | 0.4642(18) | 0.4858(26) | 0.2505(7) | 1                 | 0.015(1)  |
| O2          | 0.7953(16) | 0.5165(20) | 0.1797(6) | 1                 | 0.015(1)  |
| O3          | 0.8180(11) | 0.2458(28) | 0.2942(4) | 1                 | 0.015(1)  |
| O4          | 0.7885(17) | 0.0323(20) | 0.1622(5) | 1                 | 0.015(1)  |
| O5          | 0.4578(13) | 0.2924(21) | 0.1268(4) | 1                 | 0.015(1)  |
| O6          | 0.0617(14) | 0.3587(17) | 0.0842(5) | 1                 | 0.015(1)  |
| O7          | 0.3359(14) | 0.2945(21) | 0.9746(5) | 1                 | 0.015(1)  |
| O8          | 0.2326(15) | 0.8973(17) | 0.0582(5) | 1                 | 0.015(1)  |

---

| $x = 4.0$   | $x$        | $y$        | $z$       | Occ. | $U_{\text{iso.}} (\text{Å}^2)$ |
|-------------|------------|------------|-----------|------|--------------------------------|
| Ca1/Sr1(A1) | 0.1426(2)  | 0.2757(5)  | 0.2106(1) | 1    | 0.0228(9)                      |
| Ca2/Sr2(A2) | 0.7062(2)  | 0.2757(5)  | 0.0475(1) | 1    | 0.0228(9)                      |
| Ca3/Sr3(A3) | 0.4943(2)  | 0.7501(6)  | 0.1365(1) | 1    | 0.0228(9)                      |
| Ca4/Sr4(B1) | 0.9739(2)  | 0.7509(6)  | 0.0989(1) | 1    | 0.0228(9)                      |
| Nb          | 0.6630(2)  | 0.2599(5)  | 0.2111(1) | 1    | 0.001(1)                       |
| Ga          | 0.2601(3)  | 0.2136(6)  | 0.0556(1) | 1    | 0.018(1)                       |
| O1          | 0.4736(22) | 0.5083(32) | 0.2505(8) | 1    | 0.021(1)                       |
| O2          | 0.7816(19) | 0.5220(23) | 0.1787(7) | 1    | 0.021(1)                       |

|    |            |             |           |   |          |
|----|------------|-------------|-----------|---|----------|
| O3 | 0.8200(13) | 0.2280(30)  | 0.2935(6) | 1 | 0.021(1) |
| O4 | 0.7765(19) | 0.0317(23)  | 0.1633(6) | 1 | 0.021(1) |
| O5 | 0.4593(13) | 0.2931(24)  | 0.1237(5) | 1 | 0.021(1) |
| O6 | 0.0616(16) | 0.35412(20) | 0.0818(5) | 1 | 0.021(1) |
| O7 | 0.3482(15) | 0.3052(21)  | 0.9774(6) | 1 | 0.021(1) |
| O8 | 0.2406(15) | 0.9001(18)  | 0.0566(6) | 1 | 0.021(1) |

---



Table S2. Selected interatomic distances (Å) for  $\text{Ca}_{4-x}\text{Sr}_x\text{GaNbO}_8$  ( $x = 0, 0.25, 1, 1.5, 2, 2.5, 3, 3.5,$  and  $4$ ) obtained from Rietveld refinements against XRD data.

| <b><math>\text{Ca}_4\text{GaNbO}_8</math></b>                      |            |       |            |       |            |
|--------------------------------------------------------------------|------------|-------|------------|-------|------------|
| Bond                                                               | Length (Å) | Bond  | Length (Å) | Bond  | Length (Å) |
| B1-O2                                                              | 2.251(10)  | Ga-O4 | 1.763(8)   | Nb-O2 | 1.832(10)  |
| B1-O4                                                              | 2.319(9)   | Ga-O5 | 1.825(7)   | Nb-O7 | 1.936(8)   |
| B1-O5                                                              | 2.326(9)   | Ga-O1 | 1.845(7)   | Nb-O8 | 1.963(9)   |
| B1-O1                                                              | 2.370(11)  | Ga-O3 | 1.906(10)  | Nb-O6 | 2.034(9)   |
| B1-O7                                                              | 2.420(9)   |       |            | Nb-O3 | 2.122(9)   |
| B1-O8                                                              | 2.465(8)   |       |            | Nb-O6 | 2.149(8)   |
| <b><math>\text{Ca}_{3.75}\text{Sr}_{0.25}\text{GaNbO}_8</math></b> |            |       |            |       |            |
| Bond                                                               | Length (Å) | Bond  | Length (Å) | Bond  | Length (Å) |
| B1-O2                                                              | 2.245(12)  | Ga-O4 | 1.814(10)  | Nb-O2 | 1.875(11)  |
| B1-O4                                                              | 2.300(10)  | Ga-O5 | 1.839(9)   | Nb-O7 | 1.917(9)   |
| B1-O1                                                              | 2.334(12)  | Ga-O1 | 1.843(8)   | Nb-O8 | 1.944(10)  |
| B1-O5                                                              | 2.375(10)  | Ga-O3 | 1.845(11)  | Nb-O6 | 2.037(10)  |
| B1-O7                                                              | 2.424(10)  |       |            | Nb-O6 | 2.109(10)  |
| B1-O8                                                              | 2.480(10)  |       |            | Nb-O3 | 2.148(10)  |
| <b><math>\text{Ca}_{3.35}\text{Sr}_{0.65}\text{GaNbO}_8</math></b> |            |       |            |       |            |
| Bond                                                               | Length (Å) | Bond  | Length (Å) | Bond  | Length (Å) |
| B1-O6                                                              | 2.251(9)   | Ga-O8 | 1.790(8)   | Nb-O2 | 1.879(10)  |
| B1-O3                                                              | 2.257(8)   | Ga-O6 | 1.851(9)   | Nb-O3 | 1.883(7)   |
| B1-O8                                                              | 2.311(9)   | Ga-O7 | 1.853(9)   | Nb-O4 | 1.896(10)  |
| B1-O7                                                              | 2.380(8)   | Ga-O5 | 1.888(8)   | Nb-O1 | 2.039(10)  |
| B1-O4                                                              | 2.407(10)  |       |            | Nb-O1 | 2.075(10)  |
| B1-O2                                                              | 2.479(10)  |       |            | Nb-O5 | 2.088(7)   |
| <b><math>\text{Ca}_{3.25}\text{Sr}_{0.75}\text{GaNbO}_8</math></b> |            |       |            |       |            |
| Bond                                                               | Length (Å) | Bond  | Length (Å) | Bond  | Length (Å) |
| B1-O6                                                              | 2.253(9)   | Ga-O8 | 1.787(8)   | Nb-O2 | 1.879(9)   |
| B1-O3                                                              | 2.268(8)   | Ga-O6 | 1.810(9)   | Nb-O3 | 1.887(8)   |
| B1-O8                                                              | 2.339(9)   | Ga-O7 | 1.844(9)   | Nb-O4 | 1.896(9)   |
| B1-O7                                                              | 2.387(8)   | Ga-O5 | 1.856(8)   | Nb-O1 | 2.029(11)  |
| B1-O4                                                              | 2.422(11)  |       |            | Nb-O1 | 2.086(11)  |

|                                                          |            |       |            |       |            |
|----------------------------------------------------------|------------|-------|------------|-------|------------|
| B1-O2                                                    | 2.456(10)  |       |            | Nb-O5 | 2.103(7)   |
| <b>Ca<sub>3</sub>SrGaNbO<sub>8</sub></b>                 |            |       |            |       |            |
| Bond                                                     | Length (Å) | Bond  | Length (Å) | Bond  | Length (Å) |
| B1-O3                                                    | 2.280(6)   | Ga-O6 | 1.795(7)   | Nb-O2 | 1.880(8)   |
| B1-O6                                                    | 2.301(7)   | Ga-O8 | 1.806(7)   | Nb-O4 | 1.893(8)   |
| B1-O8                                                    | 2.368(8)   | Ga-O7 | 1.858(7)   | Nb-O3 | 1.894(6)   |
| B1-O7                                                    | 2.400(7)   | Ga-O5 | 1.888(6)   | Nb-O1 | 2.048(9)   |
| B1-O4                                                    | 2.420(8)   |       |            | Nb-O1 | 2.072(9)   |
| B1O2                                                     | 2.420(9)   |       |            | Nb-O5 | 2.108(6)   |
| <b>Ca<sub>2.5</sub>Sr<sub>1.5</sub>GaNbO<sub>8</sub></b> |            |       |            |       |            |
| Bond                                                     | Length (Å) | Bond  | Length (Å) | Bond  | Length (Å) |
| B1-O6                                                    | 2.263(10)  | Ga-O8 | 1.810(9)   | Nb-O4 | 1.857(10)  |
| B1-O8                                                    | 2.296(10)  | Ga-O6 | 1.842(10)  | Nb-O3 | 1.890(8)   |
| B1-O3                                                    | 2.298(7)   | Ga-O7 | 1.852(10)  | Nb-O2 | 1.913(11)  |
| B1-O2                                                    | 2.397(11)  | Ga-O5 | 1.905(8)   | Nb-O1 | 2.044(12)  |
| B1-O7                                                    | 2.416(9)   |       |            | Nb-O1 | 2.075(12)  |
| B1-O4                                                    | 2.461(11)  |       |            | Nb-O5 | 2.104(7)   |
| <b>Ca<sub>2</sub>Sr<sub>2</sub>GaNbO<sub>8</sub></b>     |            |       |            |       |            |
| Bond                                                     | Length (Å) | Bond  | Length (Å) | Bond  | Length (Å) |
| B1-O6                                                    | 2.279(12)  | Ga-O8 | 1.786(10)  | Nb-O4 | 1.874(12)  |
| B1-O8                                                    | 2.317(11)  | Ga-O6 | 1.803(11)  | Nb-O3 | 1.877(9)   |
| B1-O3                                                    | 2.332(9)   | Ga-O7 | 1.824(10)  | Nb-O2 | 1.914(12)  |
| B1-O2                                                    | 2.402(12)  | Ga-O5 | 1.858(9)   | Nb-O1 | 2.045(14)  |
| B1-O4                                                    | 2.444(12)  |       |            | Nb-O1 | 2.087(14)  |
| B1-O7                                                    | 2.444(10)  |       |            | Nb-O5 | 2.144(8)   |
| <b>Ca<sub>1.5</sub>Sr<sub>2.5</sub>GaNbO<sub>8</sub></b> |            |       |            |       |            |
| Bond                                                     | Length (Å) | Bond  | Length (Å) | Bond  | Length (Å) |
| B1-O8                                                    | 2.238(12)  | Ga-O6 | 1.798(12)  | Nb-O4 | 1.872(13)  |
| B1-O3                                                    | 2.299(9)   | Ga-O7 | 1.837(11)  | Nb-O3 | 1.914(9)   |
| B1-O6                                                    | 2.315(12)  | Ga-O8 | 1.845(10)  | Nb-O2 | 1.920(12)  |
| B1-O2                                                    | 2.408(12)  | Ga-O5 | 1.873(9)   | Nb-O1 | 2.043(16)  |
| B1-O7                                                    | 2.411(10)  |       |            | Nb-O1 | 2.099(15)  |
| B1O4                                                     | 2.441(13)  |       |            | Nb-O5 | 2.106(8)   |
| <b>CaSr<sub>3</sub>GaNbO<sub>8</sub></b>                 |            |       |            |       |            |
| Bond                                                     | Length (Å) | Bond  | Length (Å) | Bond  | Length (Å) |

|       |           |       |           |       |           |
|-------|-----------|-------|-----------|-------|-----------|
| B1-O8 | 2.225(14) | Ga-O6 | 1.784(13) | Nb-O4 | 1.861(15) |
| B1-O3 | 2.322(11) | Ga-O7 | 1.818(13) | Nb-O3 | 1.917(11) |
| B1-O6 | 2.390(14) | Ga-O8 | 1.857(12) | Nb-O2 | 1.944(14) |
| B1-O7 | 2.426(12) | Ga-O5 | 1.872(11) | Nb-O1 | 2.059(20) |
| B1-O2 | 2.430(15) |       |           | Nb-O1 | 2.091(20) |
| B1-O4 | 2.458(16) |       |           | Nb-O5 | 2.109(10) |

---

**Ca<sub>0.5</sub>Sr<sub>3.5</sub>GaNbO<sub>8</sub>**

---

| Bond  | Length (Å) | Bond  | Length (Å) | Bond  | Length (Å) |
|-------|------------|-------|------------|-------|------------|
| B1-O8 | 2.306(11)  | Ga-O6 | 1.791(10)  | Nb-O3 | 1.879(8)   |
| B1-O6 | 2.397(10)  | Ga-O7 | 1.824(11)  | Nb-O2 | 1.913(12)  |
| B1-O3 | 2.404(8)   | Ga-O8 | 1.844(10)  | Nb-O4 | 1.914(12)  |
| B1-O4 | 2.495(12)  | Ga-O5 | 1.934(9)   | Nb-O1 | 2.019(14)  |
| B1-O7 | 2.518(10)  |       |            | Nb-O5 | 2.083(8)   |
| B1-O2 | 2.525(12)  |       |            | Nb-O1 | 2.157(14)  |

---

**Sr<sub>4</sub>GaNbO<sub>8</sub>**

---

| Bond  | Length (Å) | Bond  | Length (Å) | Bond  | Length (Å) |
|-------|------------|-------|------------|-------|------------|
| B1-O8 | 2.367(11)  | Ga-O6 | 1.786(12)  | Nb-O3 | 1.878(10)  |
| B1-O6 | 2.420(11)  | Ga-O8 | 1.822(11)  | Nb-O4 | 1.882(13)  |
| B1-O3 | 2.448(10)  | Ga-O7 | 1.844(12)  | Nb-O2 | 1.899(14)  |
| B1-O2 | 2.613(14)  | Ga-O5 | 1.899(9)   | Nb-O1 | 1.972(18)  |
| B1-O4 | 2.613(13)  |       |            | Nb-O5 | 2.135(9)   |
| B1-O7 | 2.622(10)  |       |            | Nb-O1 | 2.202(18)  |

---

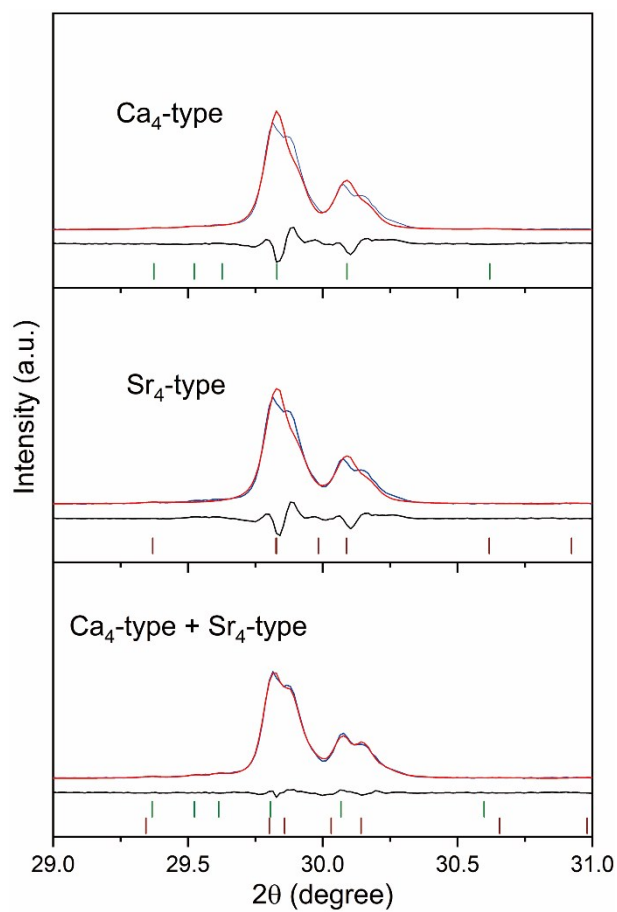

Figure S1. Le-bail fitting patterns for patterns for  $\text{Ca}_{3.5}\text{Sr}_{0.5}\text{GaNbO}_8$  with different lattice parameters.

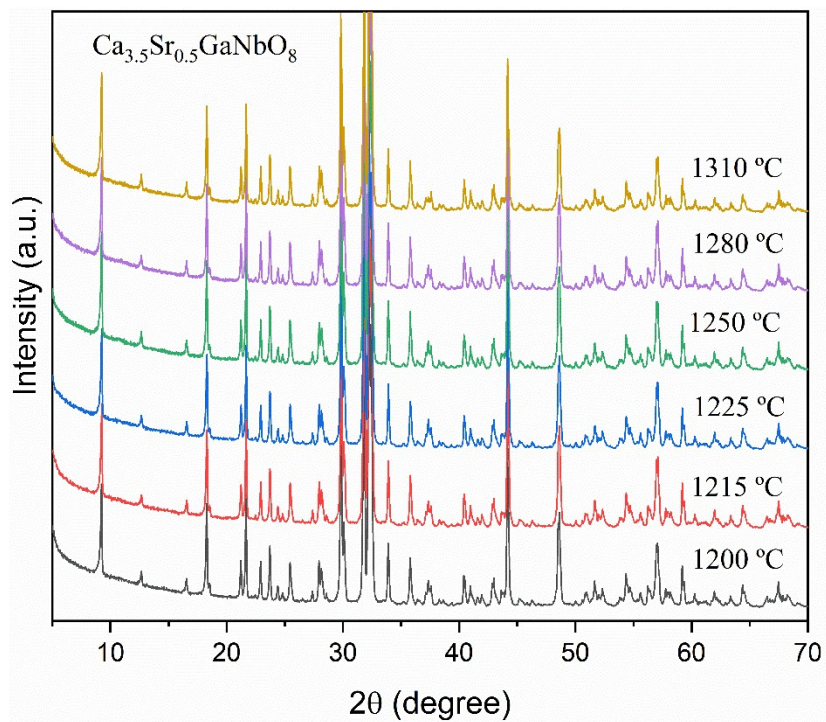

Figure S2. XRD patterns for  $\text{Ca}_{3.5}\text{Sr}_{0.5}\text{GaNbO}_8$  after being heated at different temperatures.

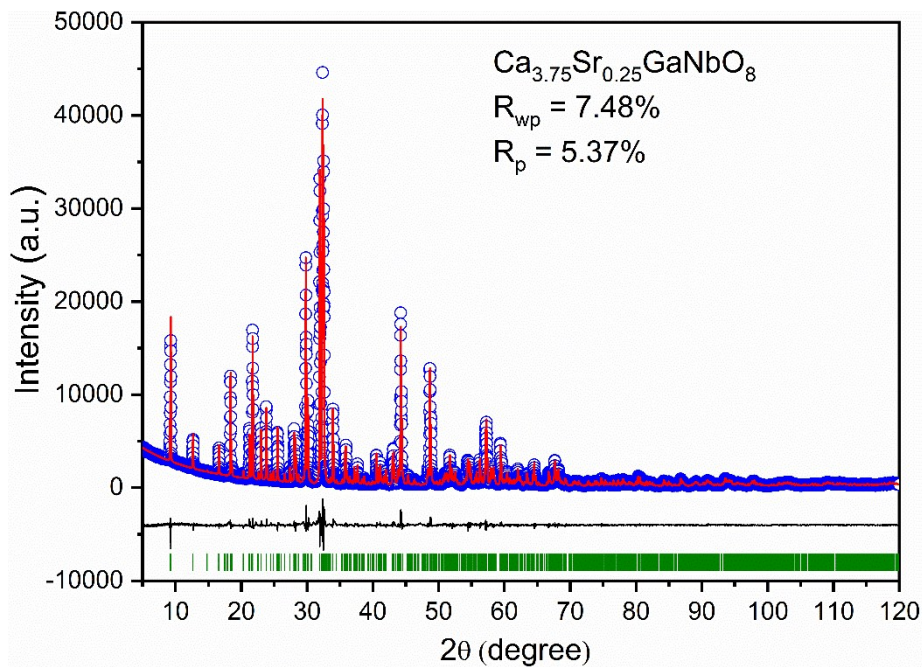

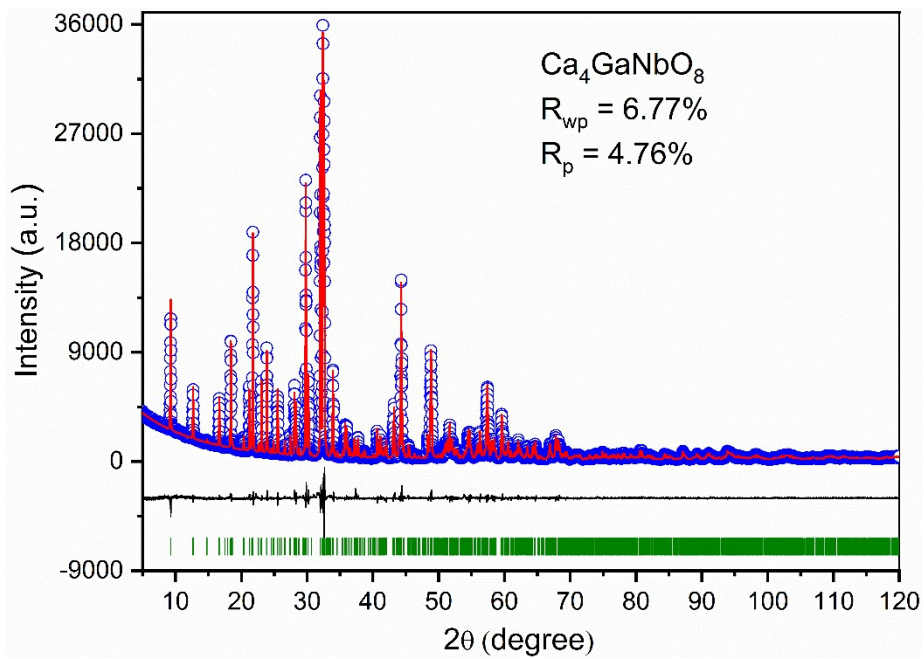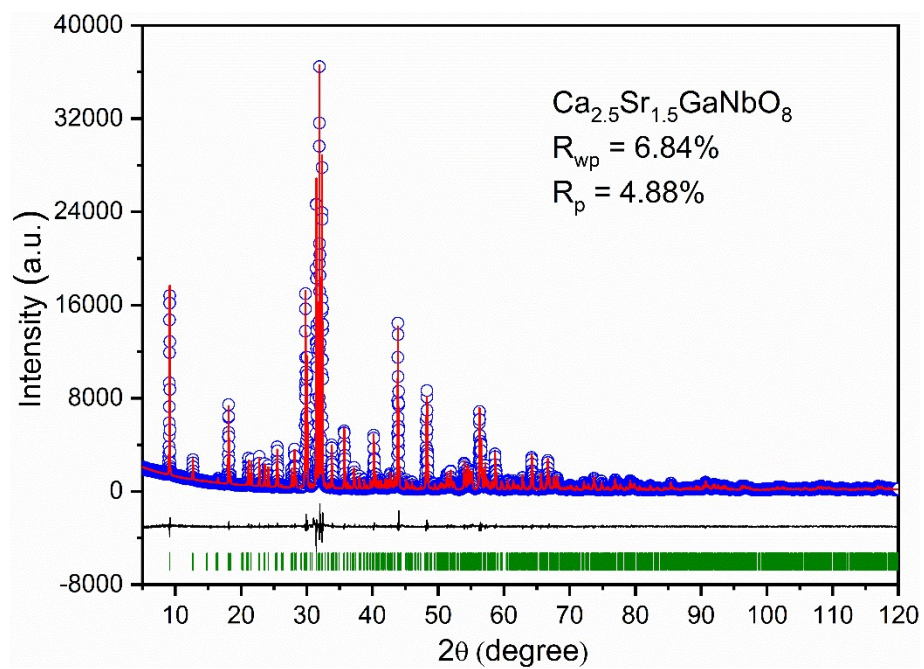



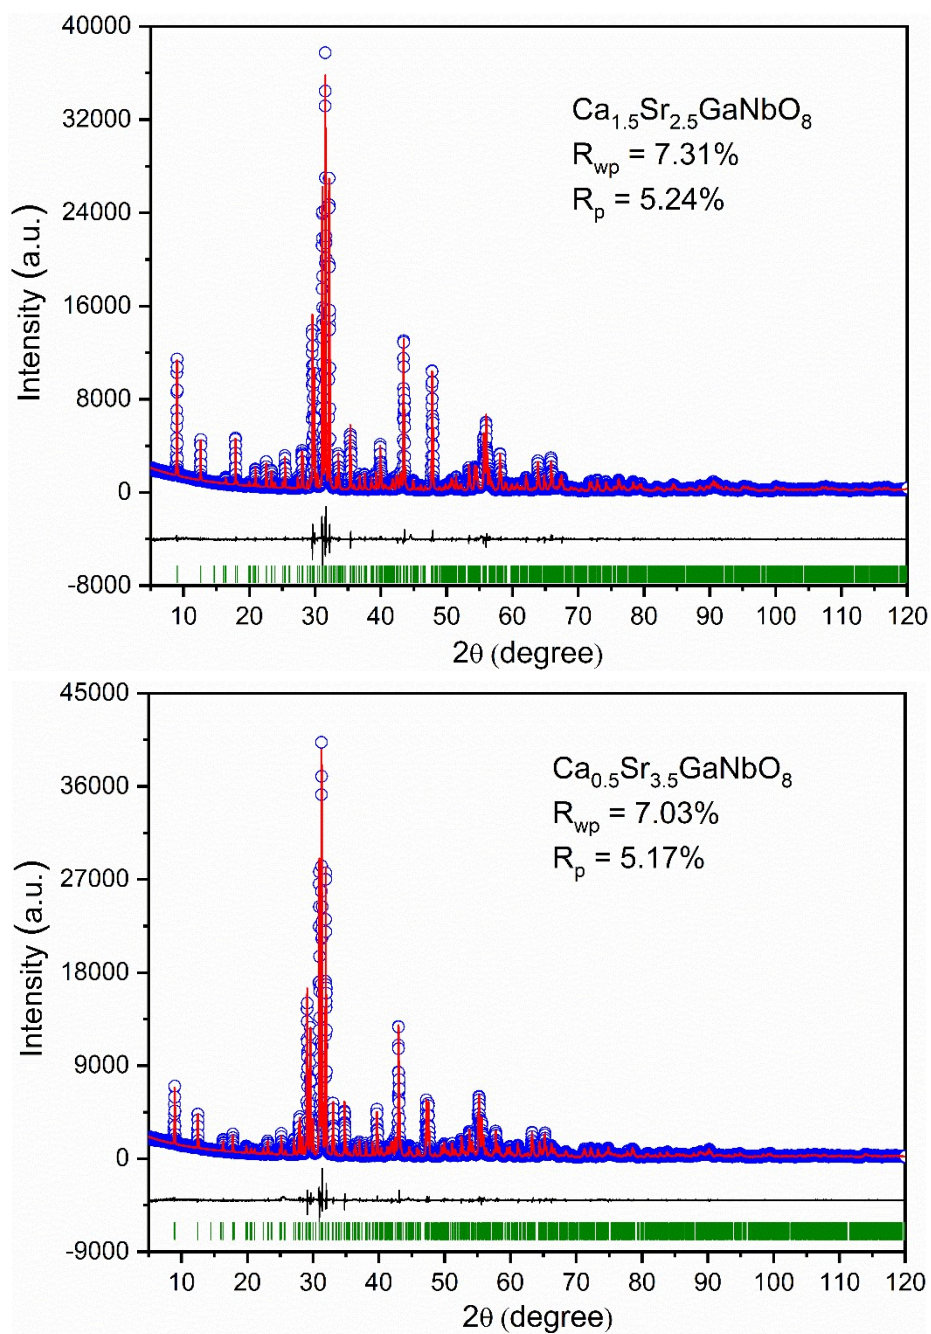

Figure S3. Rietveld refinement plot of XRD data for  $\text{Ca}_{4-x}\text{Sr}_x\text{GaNbO}_8$  ( $x = 0, 1.5, 2.5,$  and  $3.5$ ). The blue  $\circ$  and red solid line and the black solid line represent the observed, calculated patterns, and the difference of these two, respectively. The reflection positions are shown as dark green bars at the bottom of the patterns. The refined agreement factors were also given in the patterns.

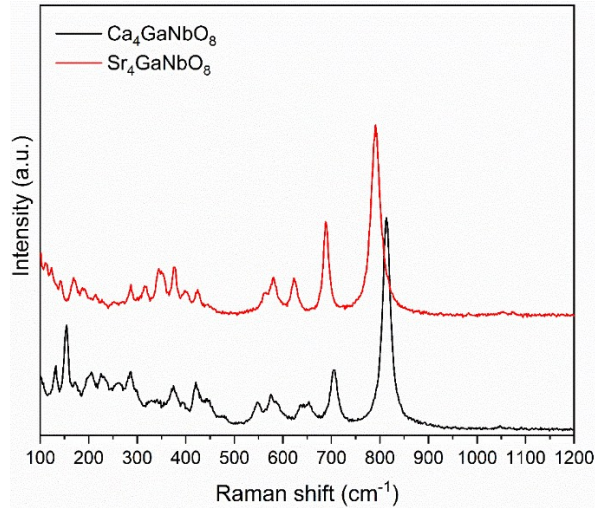

Figure S4. Raman spectra of  $\text{Ca}_4\text{GaNbO}_8$  and  $\text{Sr}_4\text{GaNbO}_8$ .

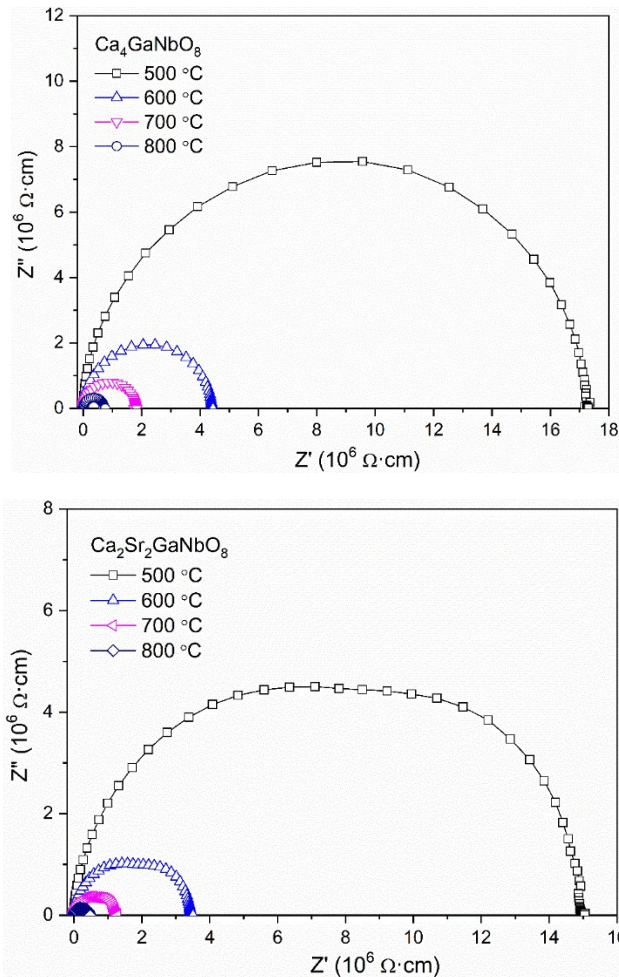

Figure S5. Complex impedance plots for  $\text{Ca}_4\text{GaNbO}_8$  and  $\text{Ca}_2\text{Sr}_2\text{GaNbO}_8$  at 500, 600, 700 and 800 °C.
